# Supplementary material
Source: publisher site journal article supplement (https://www.dovepress.com/article/supplementary_file/525882/Supplementary%20materials_1.docx)
Supplement: Supplementary file 1 [file Supplementary%20materials_1.docx]

**
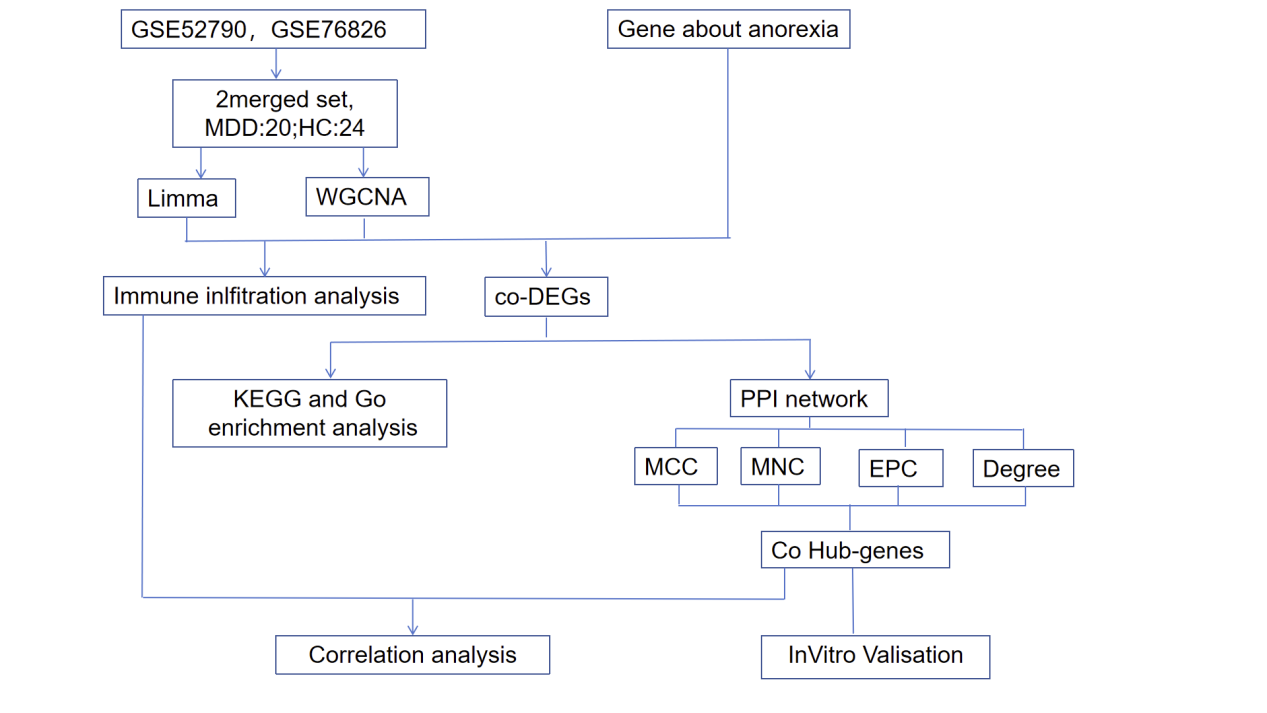
**

**Figure S1** Workflow of this study.


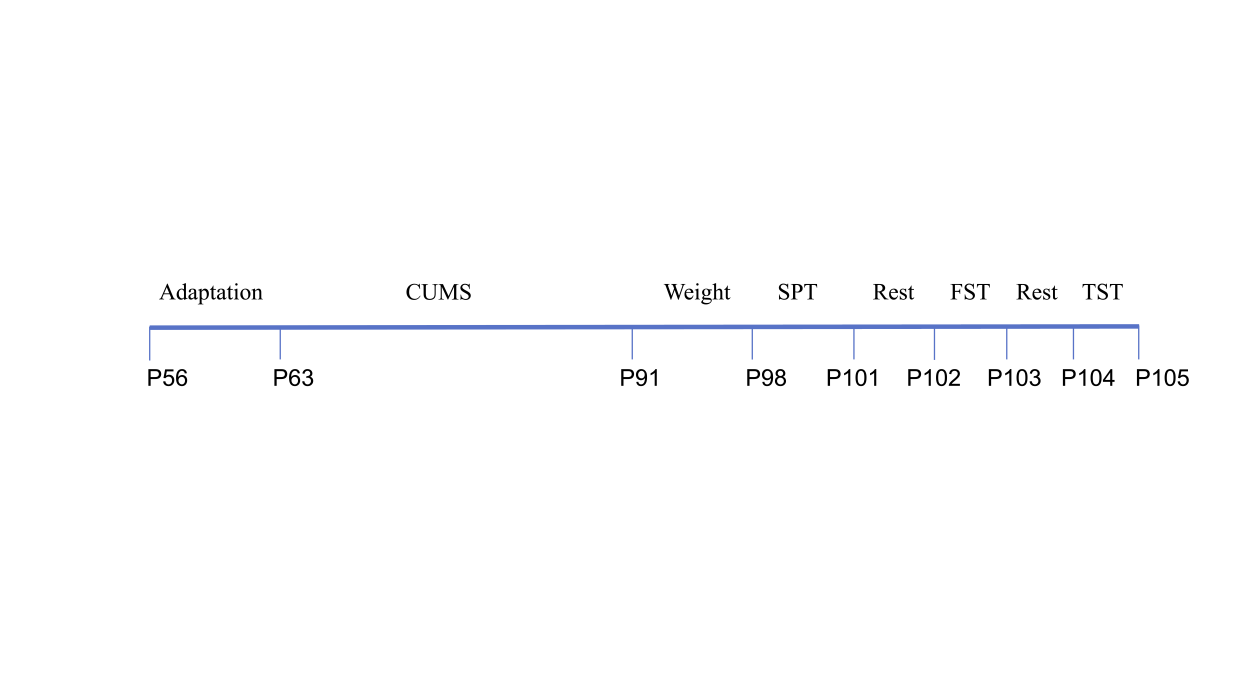


**Figure S2** Experimental Timeline for Mouse Modeling. After one week of acclimatization, the mice underwent 4 weeks of stress modeling with weekly weight tests. Behavioral tests were performed after modeling, ranging from lightly stimulated tests to heavily stimulated tests, with a one-day rest period for the mice after each test.


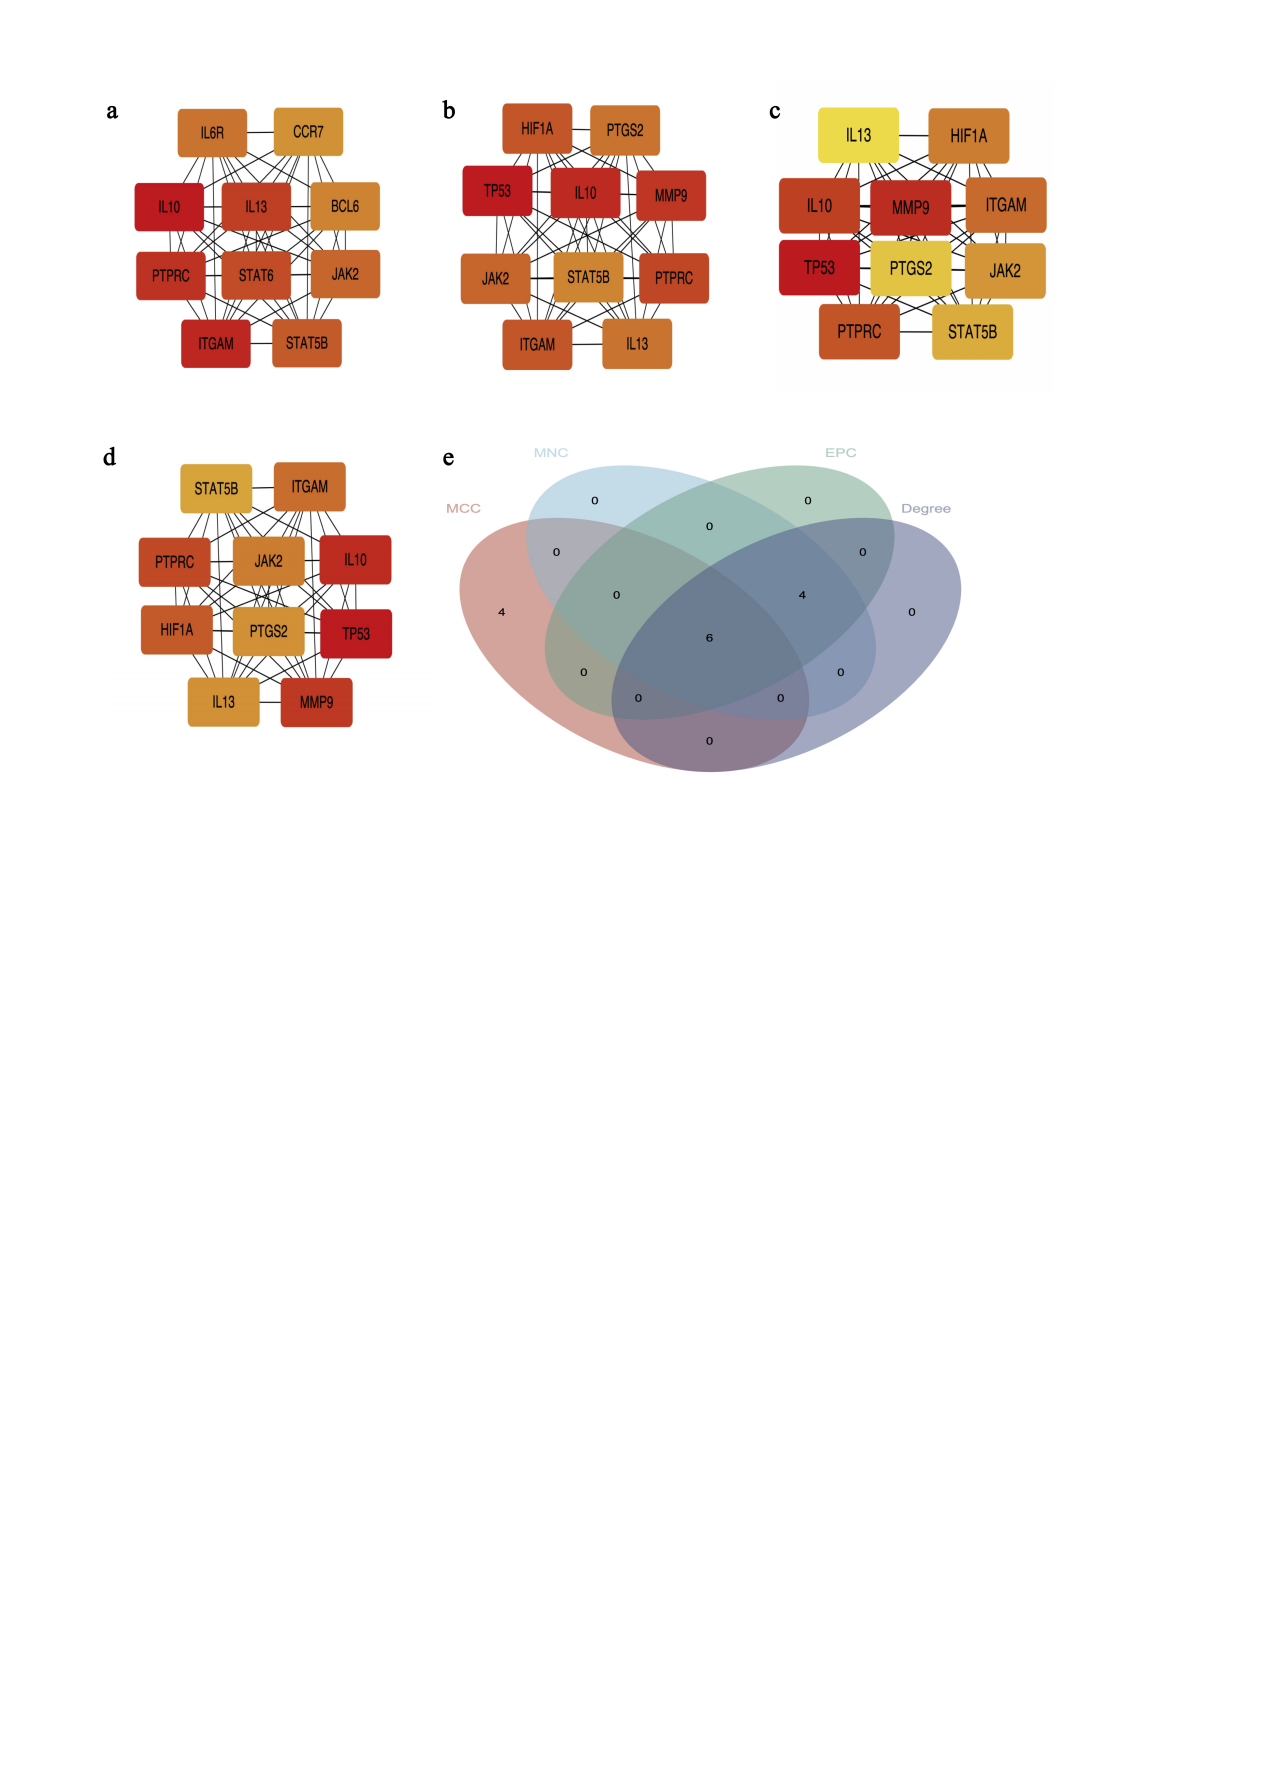


**Figure S3** The node network in the CytoHubba plugin of Cytoscape is used for the PPI network of Co-DEGs, including the top 10 node networks from four algorithms: MCC (a), MNC (b), EPC (c), and Degree (d). (e)The Venn diagram of the top 10 nodes from the MCC, MNC, EPC, and Degree algorithms in the PPI network of Co-DEGs.


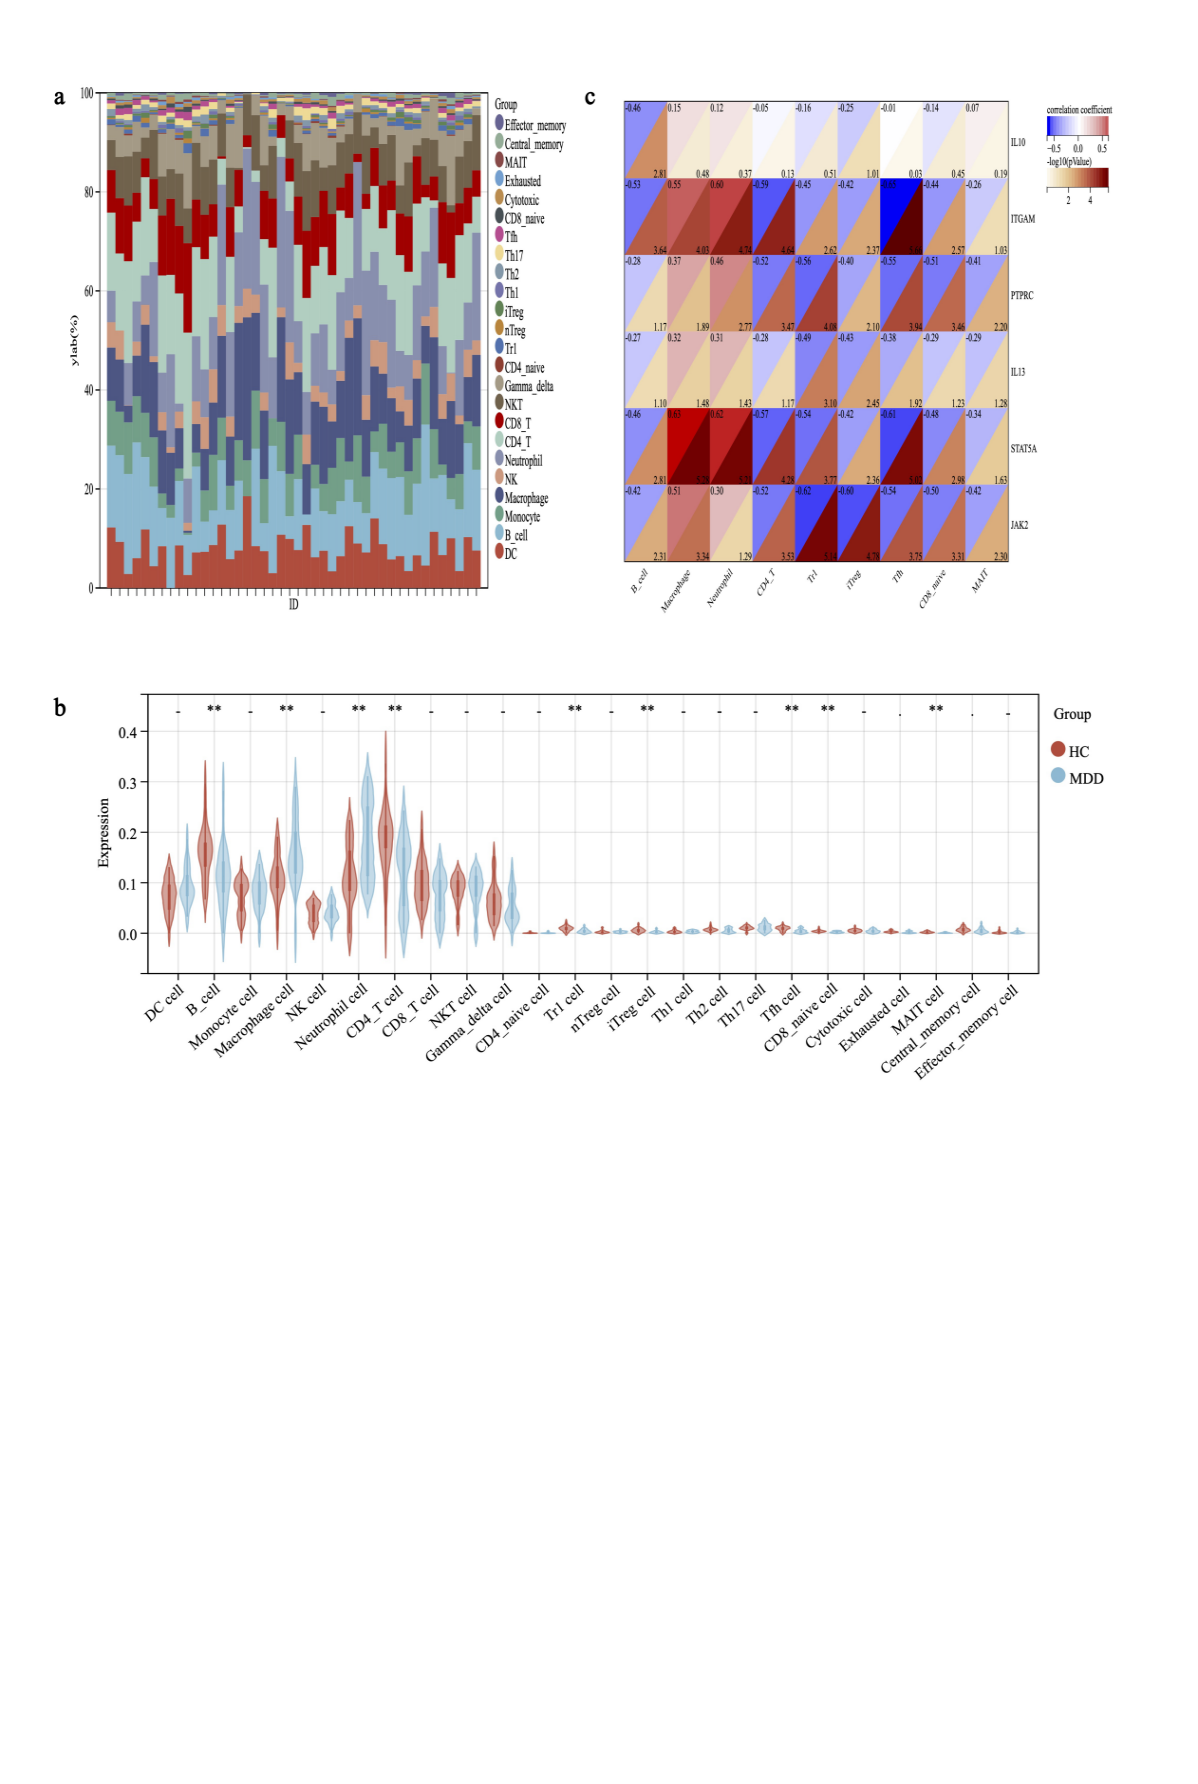


**Figure S4** Analysis of immune infiltration between MDD and HC. (a)The bar chart displays the proportion of 24 types of immune cells across all samples. (b)The violin plot displays the differences in the 24 types of immune cells between MDD and HC. (c)Correlation analysis between the differentially expressed immune cells between MDD and HC and the 10 Co-DEGs . ***p*< 0.01; -log10(*p* value) > 1.301 indicates a significant difference.
